# Supplementary material for: In situ self-assembly of conjugated polyelectrolytes for cancer targeted imaging and photodynamic therapy
Source: Royal Society of Chemistry journal article supplement (doi:10.1039/c9bm01912j), 2020-01-01
Supplement: c9bm01912j1.pdf [file c9bm01912j1.pdf]

## Supporting Information

### *In-Situ Self-Assembly of Conjugated Polyelectrolyte for Cancer Targeted Imaging and Photodynamic Therapy*

*Syeda Sadia khatoon,<sup>a,b</sup> Yanyan Chen,<sup>a</sup> Hao Zhao,<sup>a,b</sup> Fengting Lv,<sup>a</sup> Libing Liu,<sup>a,b\*</sup> and Shu Wang<sup>a,b\*</sup>*

<sup>a</sup> Beijing National Laboratory for Molecular Sciences, Key Laboratory of Organic Solids,  
Institute of Chemistry, Chinese Academy of Sciences, Beijing, 100190, P. R. China

<sup>b</sup> College of Chemistry, University of Chinese Academy of Sciences, Beijing 100049, P. R.  
China

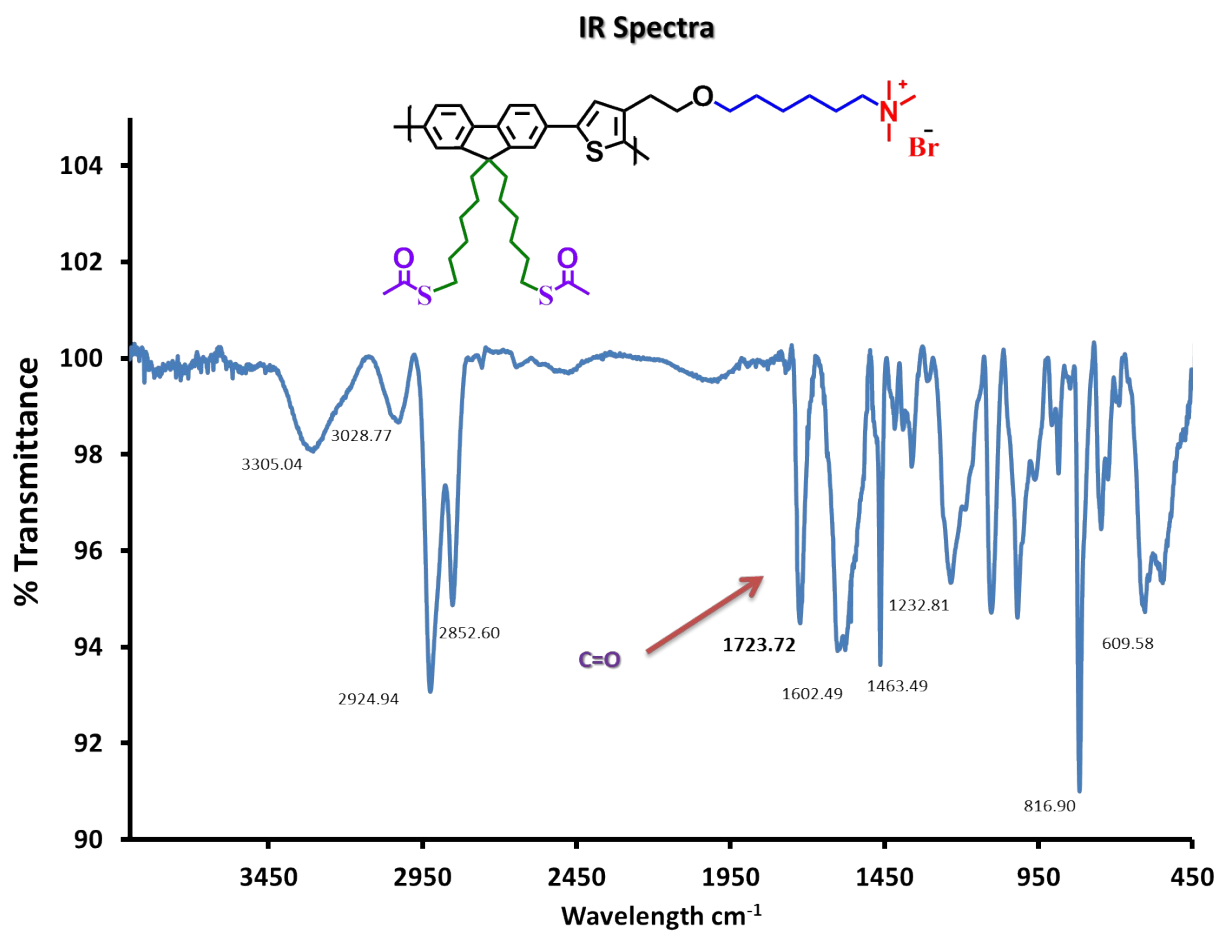

**Figure S1.** FTIR spectrum of polymer PFT-Thioester.

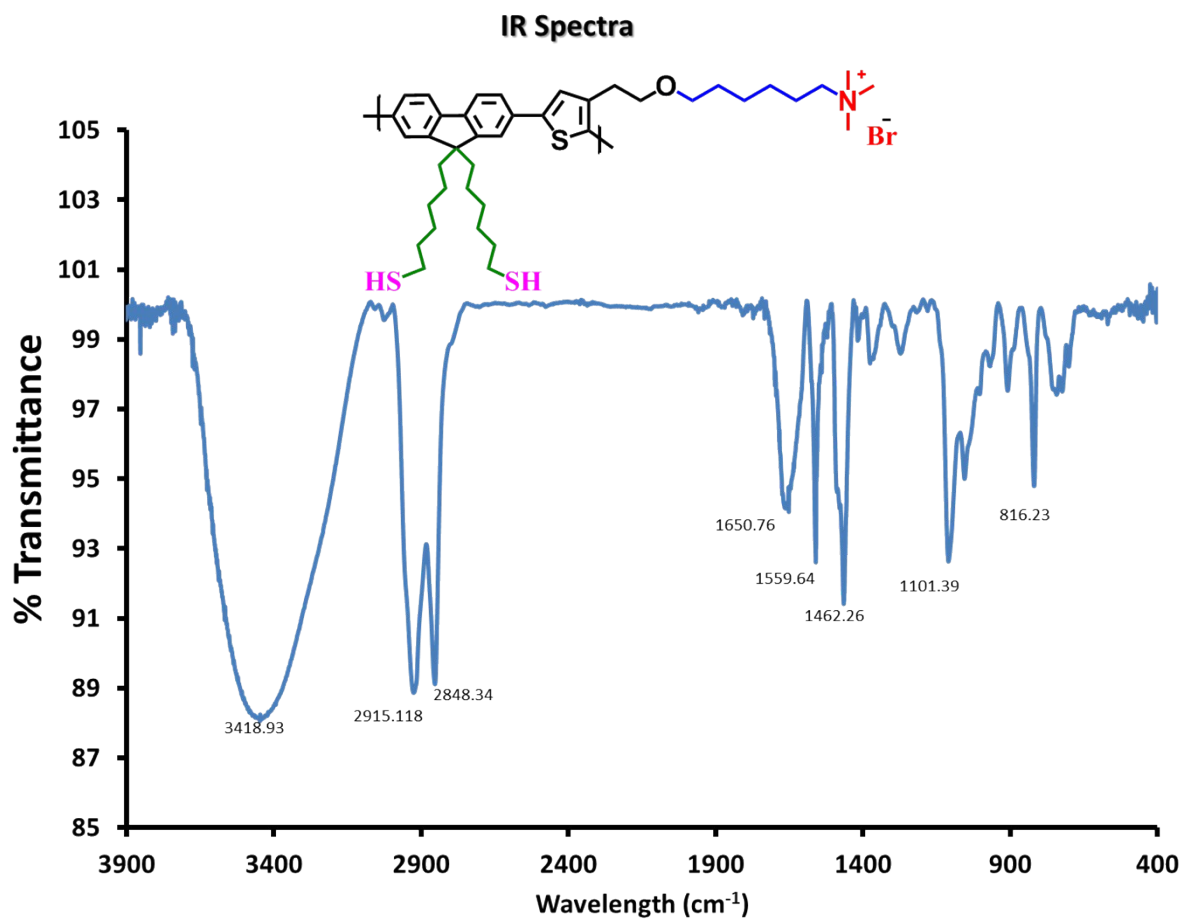

**Figure S2.** FTIR spectrum of polymer PFT-SH.

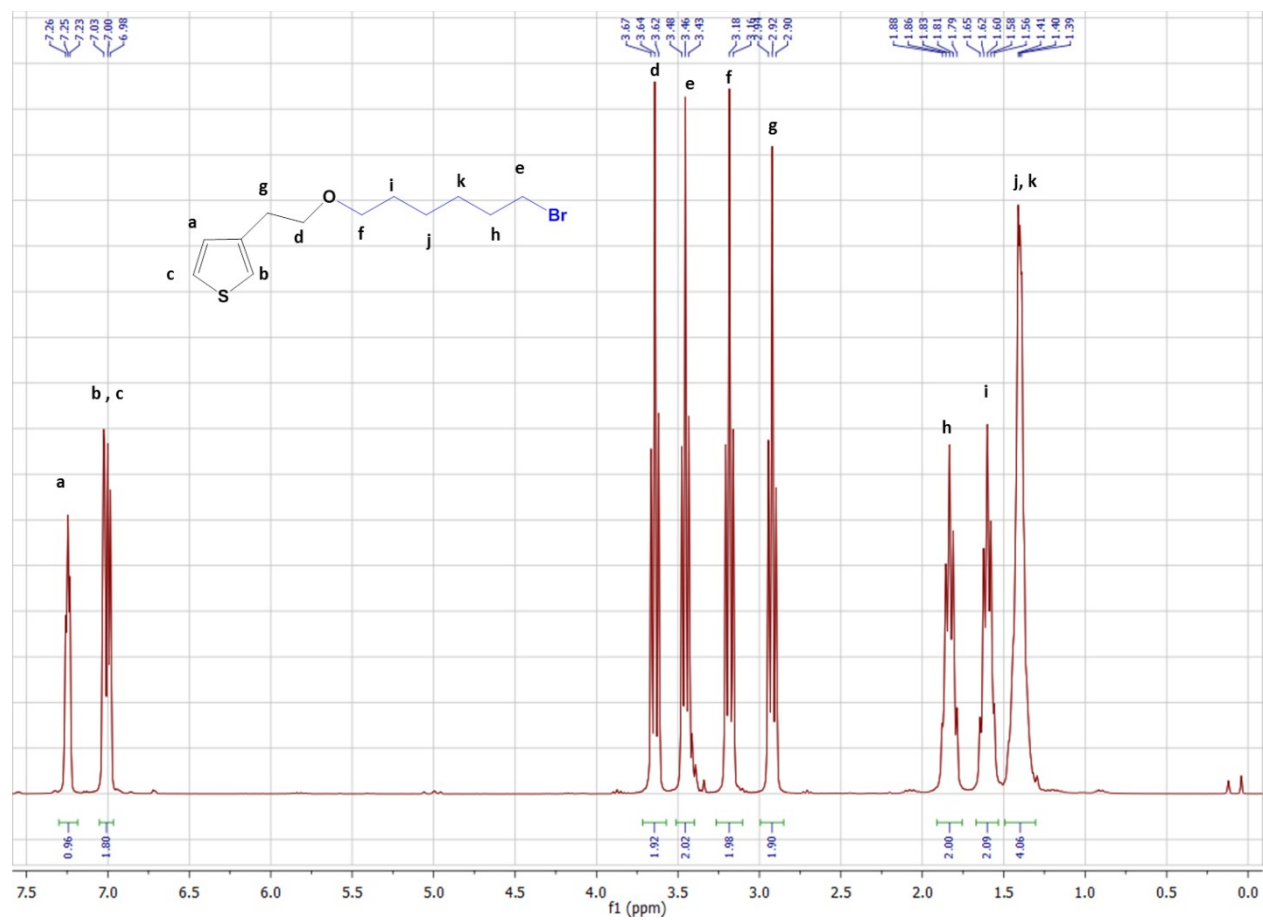

**Figure S3.** <sup>1</sup>H-NMR spectrum of Compound 1.

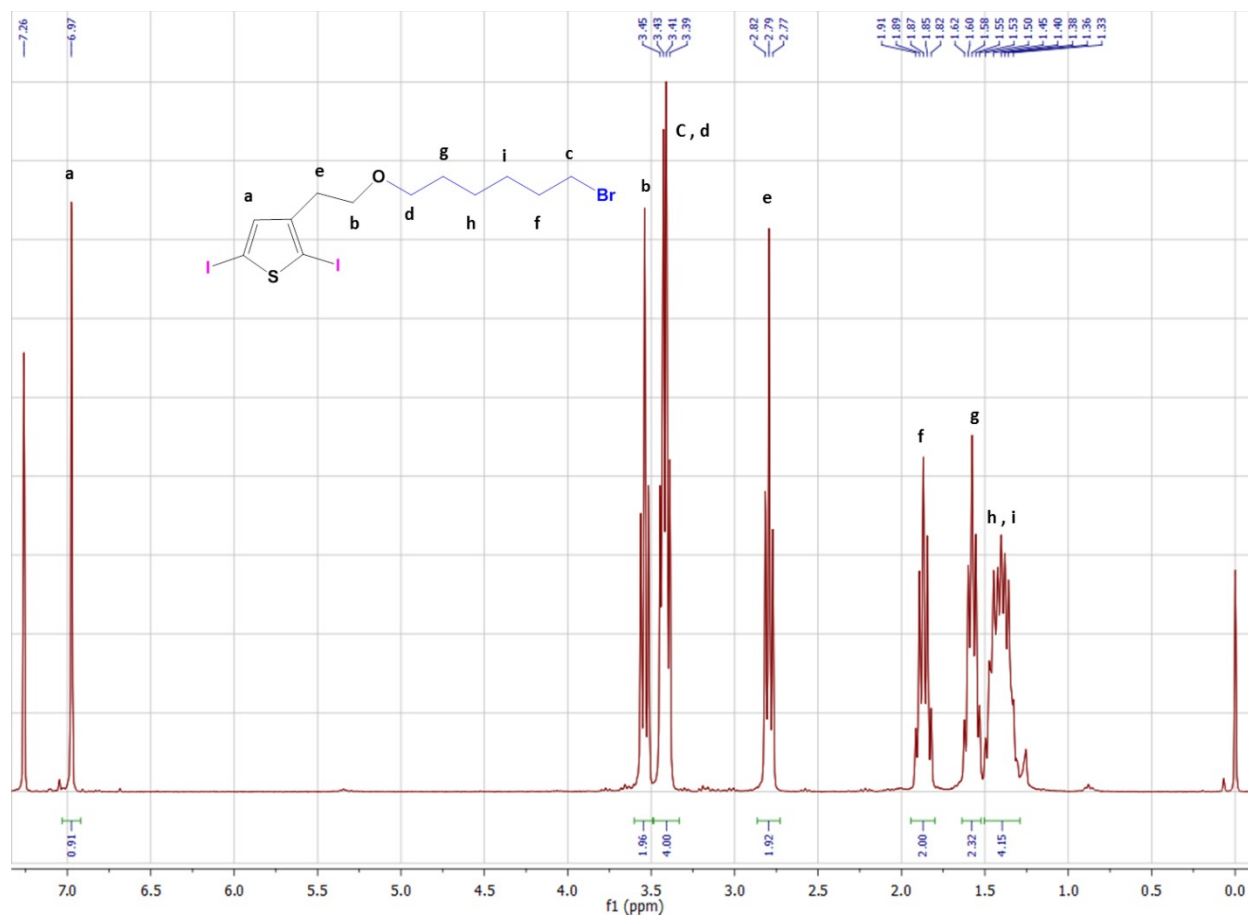

**Figure S4.** <sup>1</sup>H-NMR spectrum of Compound 2.

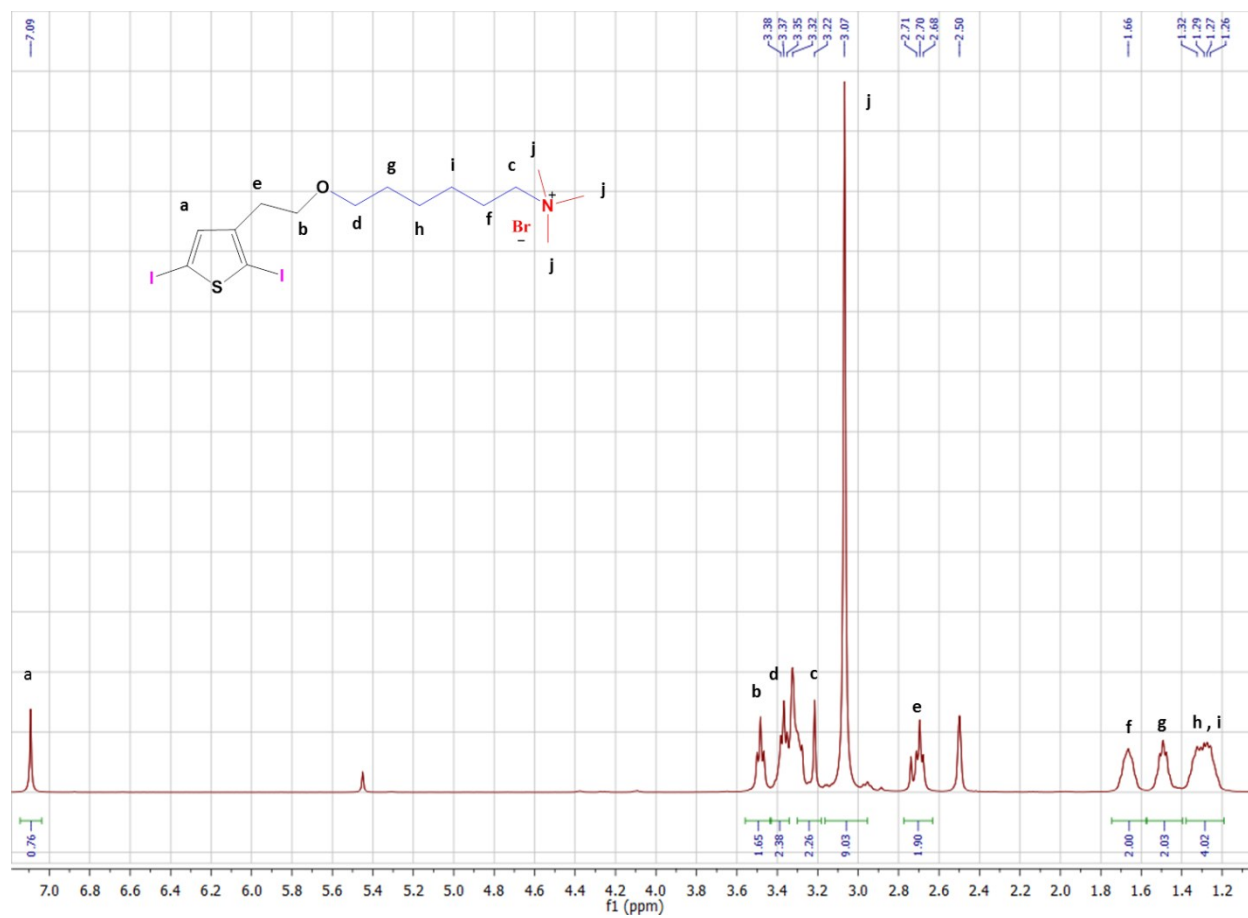

**Figure S5.**  $^1\text{H}$ -NMR spectrum of Monomer 1.

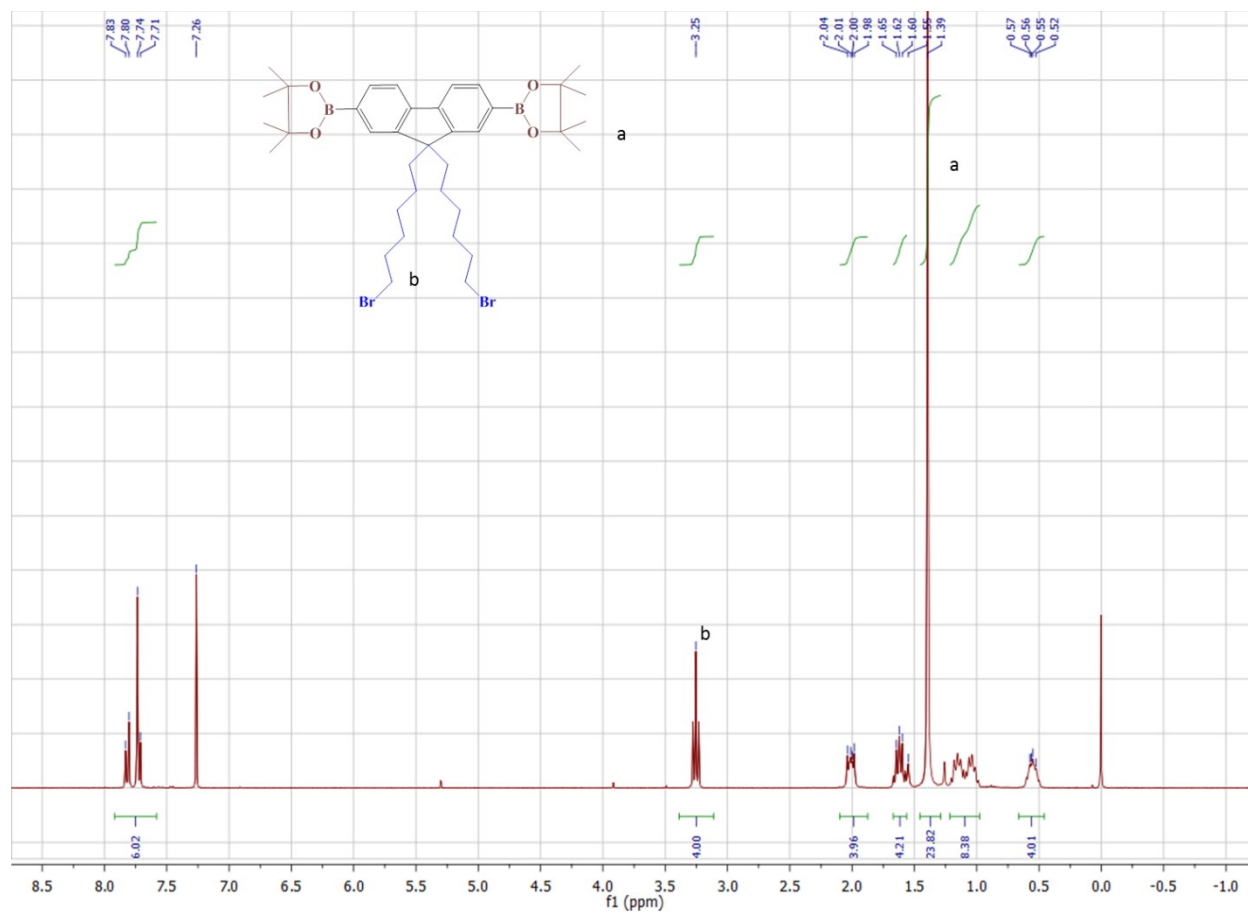

**Figure S6.**  $^1\text{H}$ -NMR spectrum of Monomer 2.

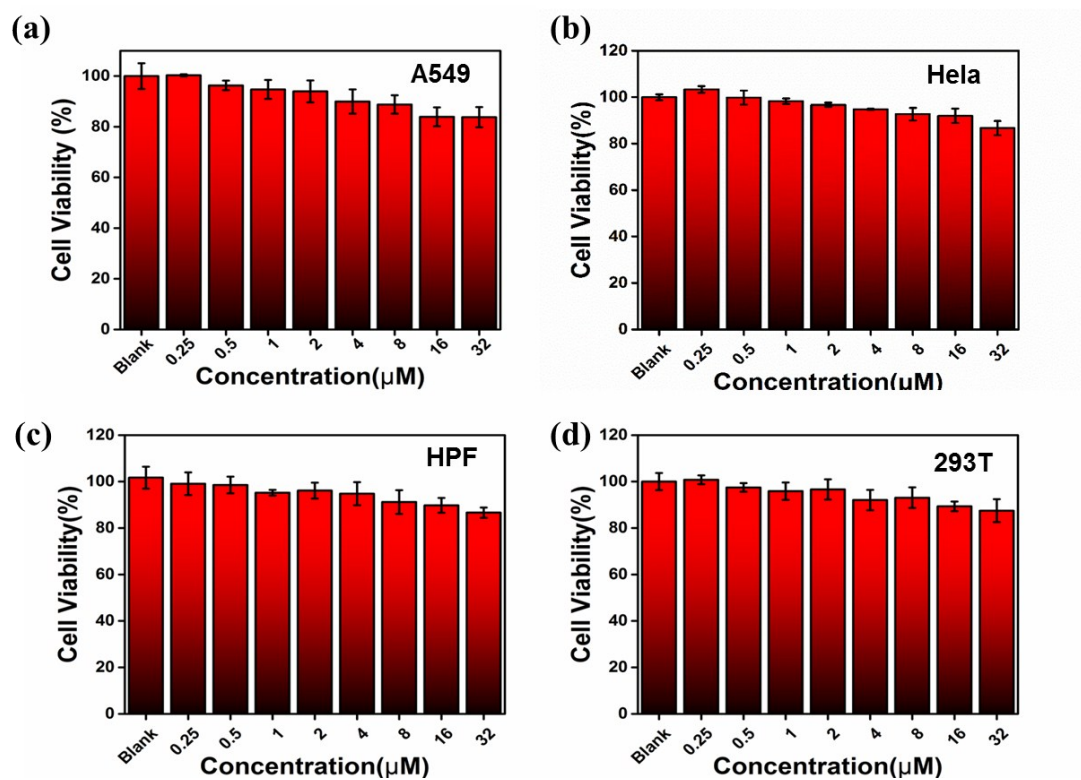

**Figure S7.** Cell viability of A549 cells (a), Hela cells (b) HPF cells (c) and 293T cells (d) after incubation with various concentrations of PFT-SH for 24 h.



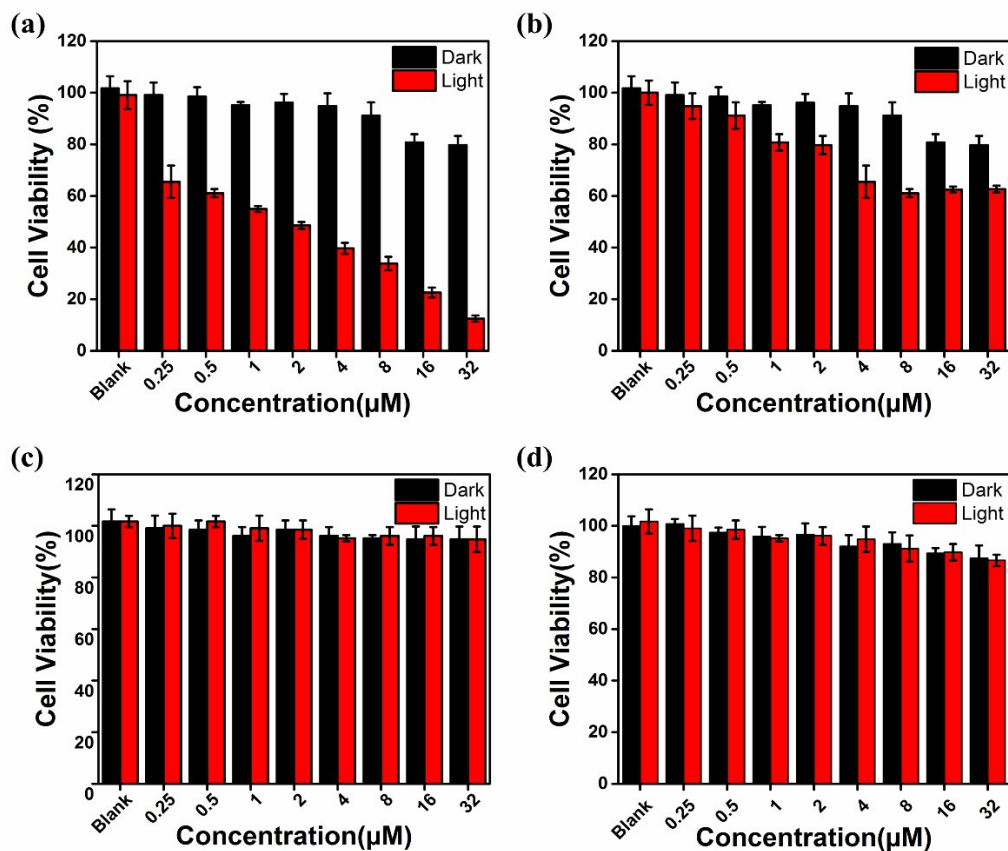

**Figure S8.** Cell viabilities of (a) A549 cells (b) Hela cells (c) HFP cells and (d) 293T cells after incubated with PFT-SH (10 μM) at different concentrations under white light irradiation (4 mW/cm<sup>2</sup>) for 30 min.

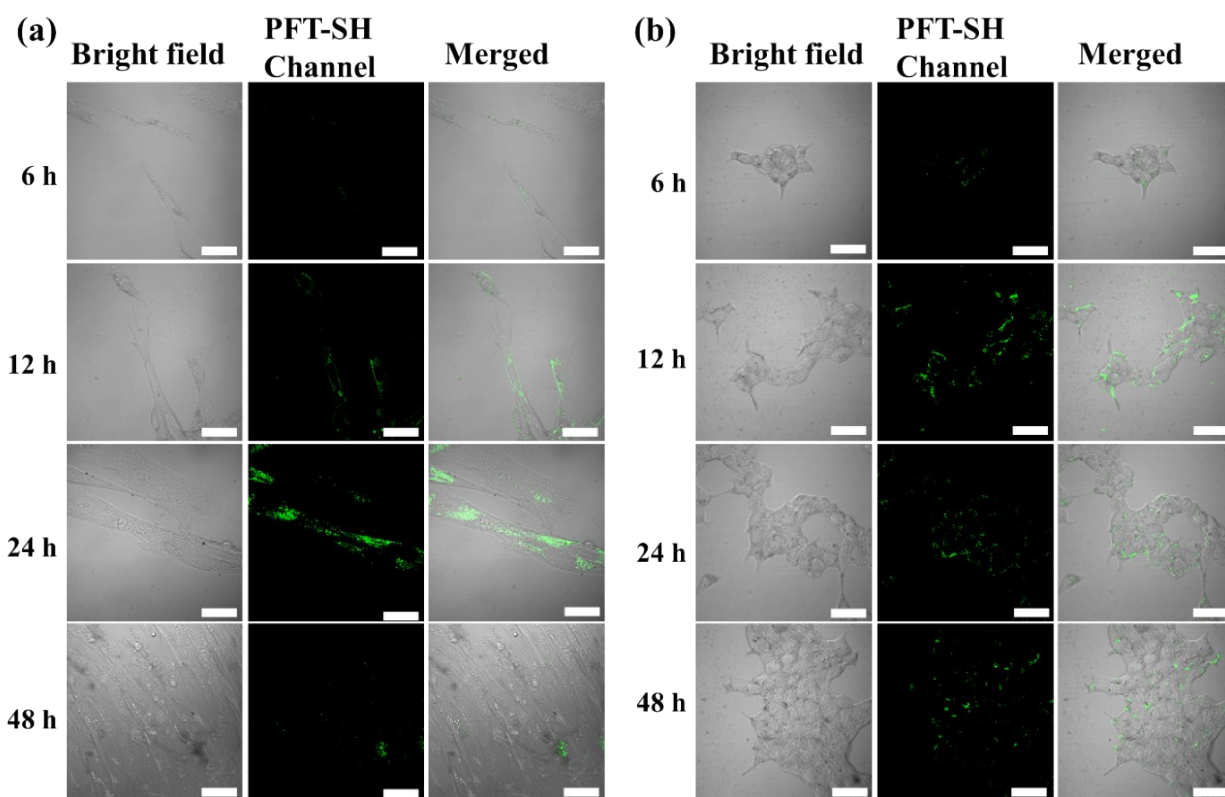

**Figure S9.** CLSM images of (a) HPF cells and (b) 293T cells after incubation with 10  $\mu$ M PFT-SH at different time intervals. The scale bars are 20  $\mu$ m.

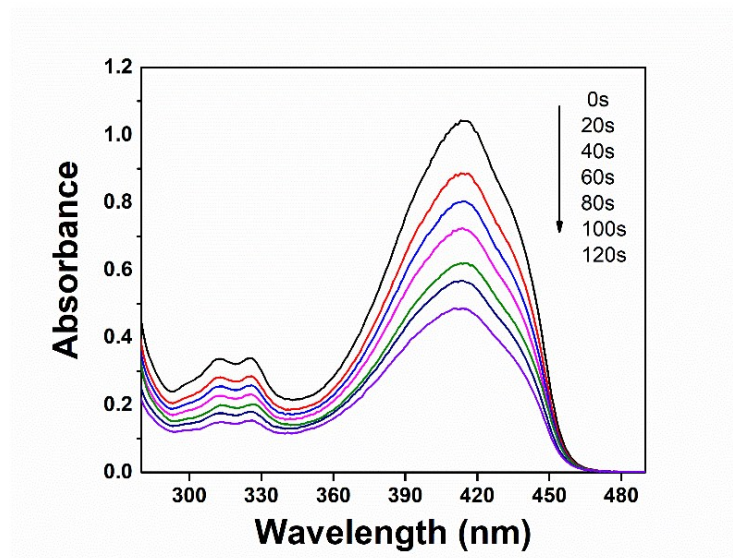

**Figure S10.** UV-Vis spectral change of PFT-SH and DPBF under irradiation (400 nm) over 120 s, recorded every 20 s.

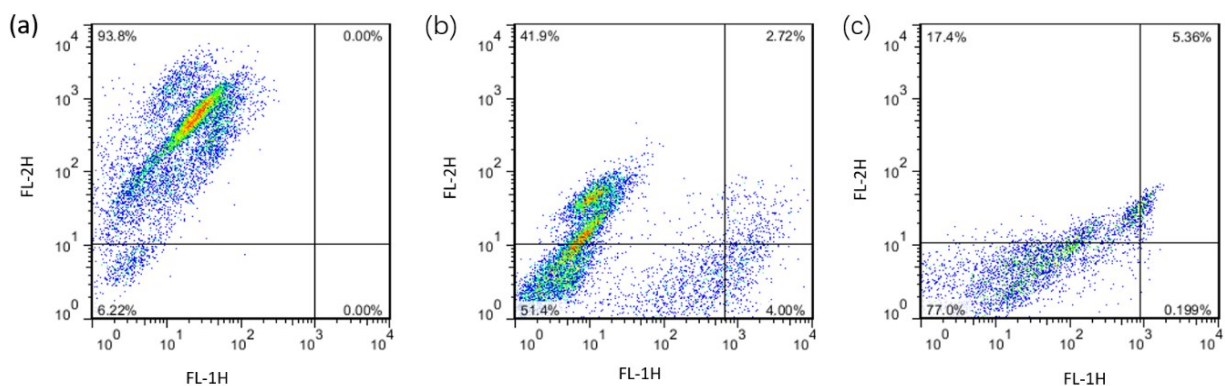

**Figure S11.** Cell apoptosis assays performed with an Annexin V-FITC apoptosis detection kit. Upper right quadrant and upper left quadrant shown late apoptosis and early apoptosis stage respectively. The percentage of cells revealed apoptosis (a) A549 cells with 93.8 % apoptosis (b) HeLa cells with 41.9 % apoptosis (c) HPF cells have only 17.4% apoptotic population.

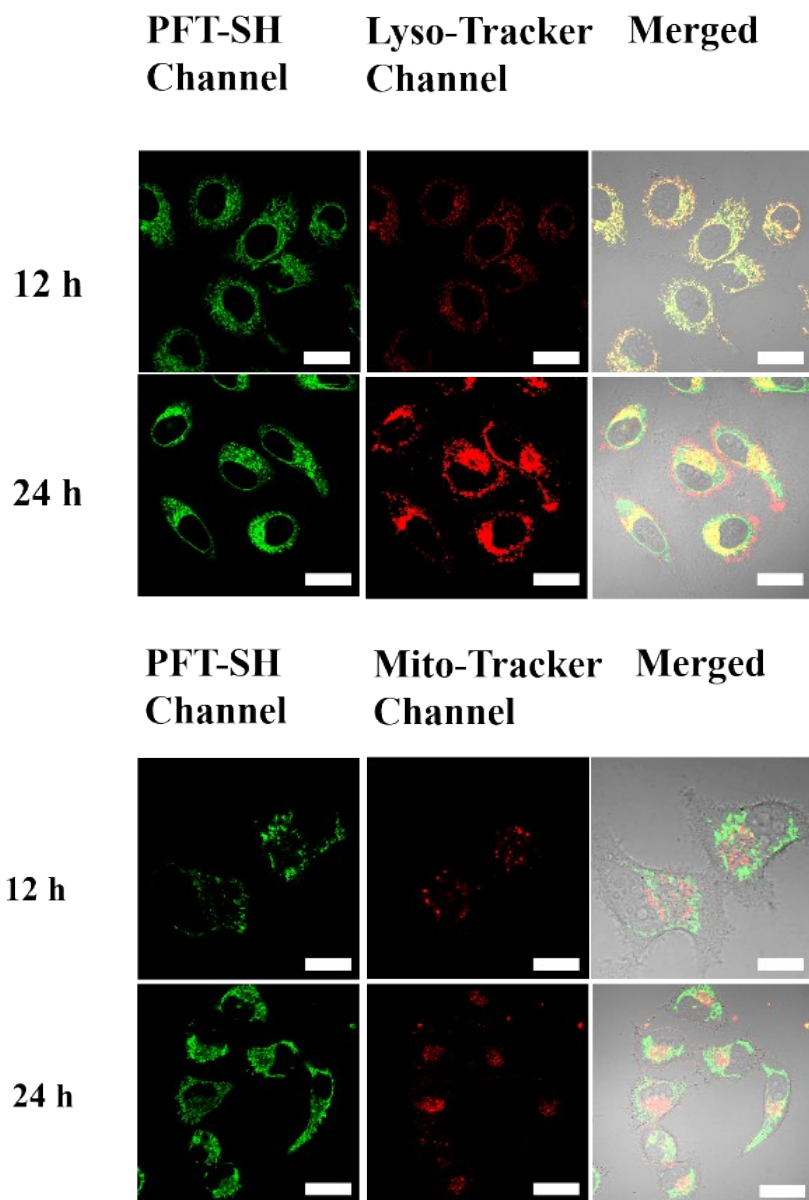

**Figure S12.** CLSM images of (a) A549 with 10  $\mu$ M PFT-SH incubated for 12 h and 24 h respectively. The scale bars are 20  $\mu$ M.

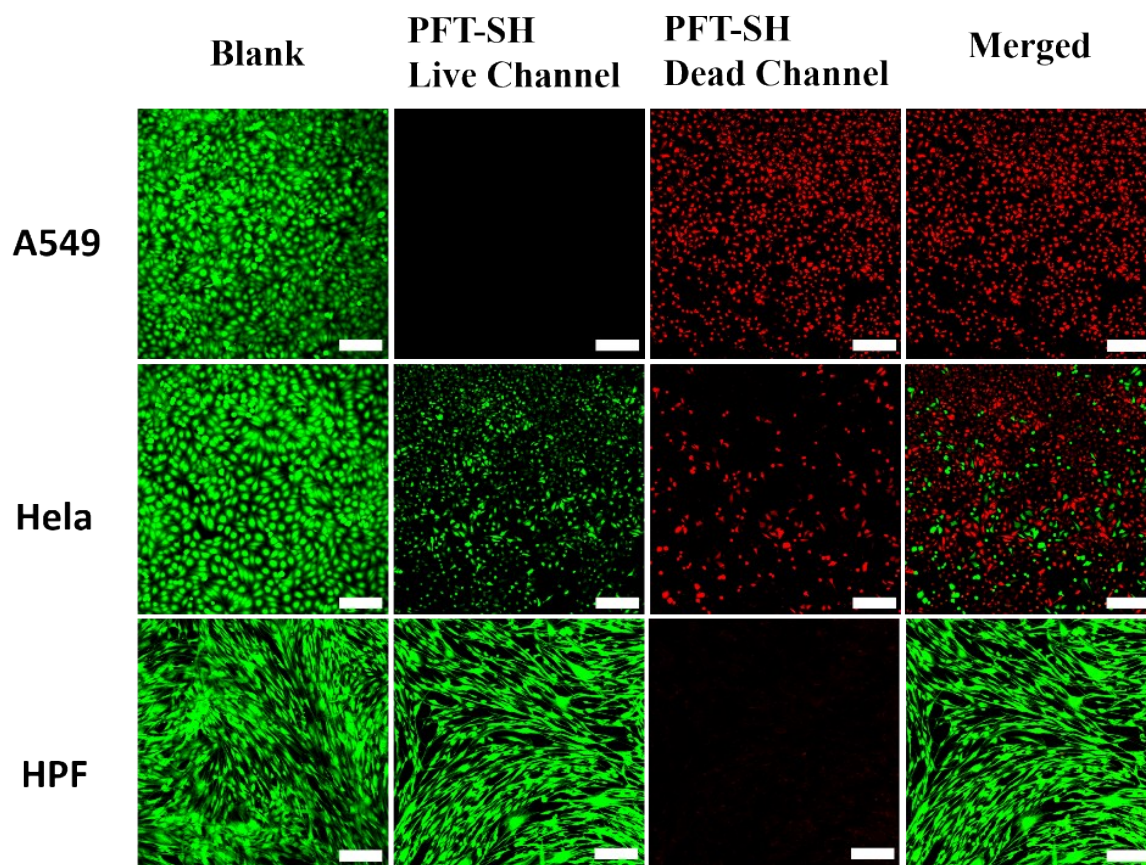

**Figure S13.** Confocal images of live and dead double-stained A549, Hela and HPF cells after PDT treatment. Green channel depicts live cells and red channel depicts compromised/dead cells.
